# Supplementary material for: SNP rs12982687 affects binding capacity of lncRNA UCA1 with miR-873-5p: involvement in smoking-triggered colorectal cancer progression
Source: PubMed Central journal article supplement (PMC7059387; doi:10.1186/s12964-020-0518-0), 2020-03-06

**(A)**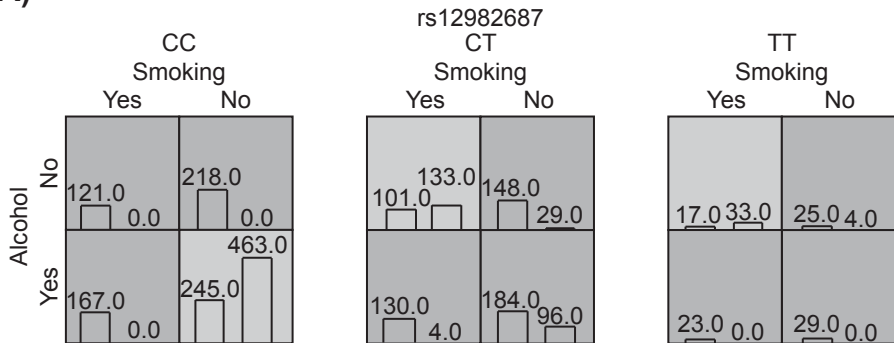**(B)**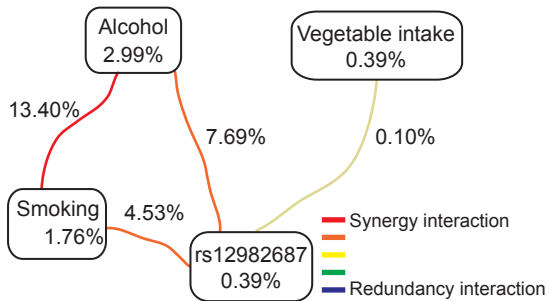**(C)**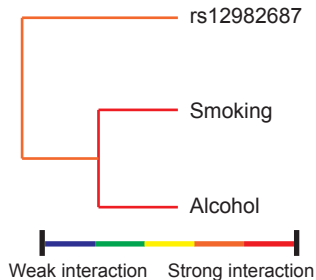

Supplement: 12964_2020_518_MOESM1_ESM.pdf [file 12964_2020_518_MOESM1_ESM.pdf]
